# Supplementary material for: A Comparison of Normalization Techniques for Individual Baseline-Free Estimation of Absolute Hypovolemic Status Using a Porcine Model
Source: MDPI journal article supplement (doi:10.3390/bios14020061), 2024-01-23
Supplement: s1 [file s1]

**A Comparison of Normalization Techniques for Individual Baseline-Free Estimation of  
Absolute Hypovolemic Status using a Porcine Model**  
*Supplementary Material*

**Table S1.** Preliminary performance of ABVS models, including mean (M) and standard deviation (SD).

\*\*Indicates the model with the best performance. IBN = Individual baseline normalization.

| Method Name                  | Features                                                                                   | Method Equation                     | R <sup>2</sup> |                      | AUC  |                      | RMSE (%) |                      |
|------------------------------|--------------------------------------------------------------------------------------------|-------------------------------------|----------------|----------------------|------|----------------------|----------|----------------------|
|                              |                                                                                            |                                     | M              | SD                   | M    | SD                   | M        | SD                   |
| 12-feature model<br>w/ IBN   | HR, SDRR, SD1/SD2,<br>LF/HF, PEP, LVET,<br>PEP/LVET, PPGamp,<br>PAT, PTT, nPAT, and<br>PVI | $\frac{x_j - \mu_{b,p}}{\mu_{b,p}}$ | 0.86           | 0.012                | 0.89 | 5.5*10 <sup>-3</sup> | 21.20    | 0.81                 |
| 12- feature model<br>w/o IBN | HR, SDRR, SD1/SD2,<br>LF/HF, PEP, LVET,<br>PEP/LVET, PPGamp,<br>PAT, PTT, nPAT, and<br>PVI |                                     | 0.91           | 0.017                | 0.89 | 0.012                | 29.02    | 1.05                 |
| 1-feature model<br>w/ IBN    | PEP/LVET                                                                                   | $\frac{x_j - \mu_{b,p}}{\mu_{b,p}}$ | 0.82           | 3.8*10 <sup>-4</sup> | 0.81 | 2.3*10 <sup>-4</sup> | 22.31    | 9.9*10 <sup>-4</sup> |
| 1-feature model<br>w/o IBN   | PEP/LVET                                                                                   |                                     | 0.25           | 1.7*10 <sup>-3</sup> | 0.58 | 6.5*10 <sup>-4</sup> | 40.39    | 0.027                |
| 2-feature model<br>w/ IBN    | PEP/LVET, HR                                                                               | $\frac{x_j - \mu_{b,p}}{\mu_{b,p}}$ | 0.84           | 6.8*10 <sup>-3</sup> | 0.88 | 3.8*10 <sup>-3</sup> | 22.10    | 0.37                 |
| 2-feature model<br>w/o IBN   | PEP/LVET, HR                                                                               |                                     | 0.78           | 0.013                | 0.83 | 4.6*10 <sup>-3</sup> | 34.32    | 0.58                 |
| 2-feature model<br>w/ IBN    | PEP/LVET, SDRR                                                                             | $\frac{x_j - \mu_{b,p}}{\mu_{b,p}}$ | 0.78           | 0.013                | 0.87 | 3.8*10 <sup>-3</sup> | 23.92    | 0.46                 |
| 2-feature model<br>w/o IBN   | PEP/LVET, SDRR                                                                             |                                     | 0.83           | 0.017                | 0.82 | 5.8*10 <sup>-3</sup> | 34.53    | 0.73                 |
| 3-feature model<br>w/ IBN    | PEP/LVET, HR, LVET                                                                         | $\frac{x_j - \mu_{b,p}}{\mu_{b,p}}$ | 0.86           | 9.5*10 <sup>-3</sup> | 0.90 | 5.4*10 <sup>-3</sup> | 21.25    | 0.45                 |
| 3-feature model<br>w/o IBN   | PEP/LVET, HR, LVET                                                                         |                                     | 0.92           | 0.018                | 0.84 | 8.9*10 <sup>-3</sup> | 29.39    | 0.66                 |
| 3-feature model<br>w/ IBN    | PEP/LVET, SDRR,<br>LVET                                                                    | $\frac{x_j - \mu_{b,p}}{\mu_{b,p}}$ | 0.78           | 0.018                | 0.87 | 5.0*10 <sup>-3</sup> | 23.82    | 0.72                 |
| 3-feature model<br>w/o IBN   | PEP/LVET, SDRR,<br>LVET                                                                    |                                     | 0.78           | 0.011                | 0.85 | 4.5*10 <sup>-3</sup> | 35.39    | 0.44                 |
| 4-feature model<br>w/ IBN ** | HR, PEP, LVET, and<br>PEP/LVET                                                             | $\frac{x_j - \mu_{b,p}}{\mu_{b,p}}$ | 0.90           | 4.7*10 <sup>-3</sup> | 0.92 | 6.0*10 <sup>-3</sup> | 19.47    | 0.12                 |

|                            |                                                         |                                     |      |                       |      |                       |       |      |
|----------------------------|---------------------------------------------------------|-------------------------------------|------|-----------------------|------|-----------------------|-------|------|
| 4-feature model<br>w/o IBN | HR, PEP, LVET, and<br>PEP/LVET                          |                                     | 0.81 | 0.047                 | 0.85 | 9.2*10 <sup>-3</sup>  | 28.96 | 0.69 |
| 4-feature model<br>w/ IBN  | HR, SDRR, LVET, and<br>PEP/LVET                         | $\frac{x_j - \mu_{b,p}}{\mu_{b,p}}$ | 0.80 | 6.2 *10 <sup>-3</sup> | 0.89 | 3.9*10 <sup>-3</sup>  | 23.07 | 0.25 |
| 4-feature model<br>w/o IBN | HR, SDRR, LVET, and<br>PEP/LVET                         |                                     | 0.92 | 9.2 *10 <sup>-3</sup> | 0.87 | 6.1*10 <sup>-3</sup>  | 33.36 | 0.28 |
| 5-feature model<br>w/ IBN  | HR, SDRR, PEP, LVET,<br>and PEP/LVET                    | $\frac{x_j - \mu_{b,p}}{\mu_{b,p}}$ | 0.86 | 5.6 *10 <sup>-3</sup> | 0.91 | 3.6 *10 <sup>-3</sup> | 21.25 | 0.43 |
| 5-feature model<br>w/o IBN | HR, SDRR, PEP, LVET,<br>and PEP/LVET                    |                                     | 0.90 | 0.023                 | 0.88 | 0.010                 | 30.09 | 0.74 |
| 6-feature model<br>w/ IBN  | HR, SDRR, SD1/SD2,<br>PEP, LVET, and<br>PEP/LVET        | $\frac{x_j - \mu_{b,p}}{\mu_{b,p}}$ | 0.84 | 0.016                 | 0.89 | 7.1*10 <sup>-3</sup>  | 22.32 | 0.73 |
| 6-feature model<br>w/o IBN | HR, SDRR, SD1/SD2,<br>PEP, LVET, and<br>PEP/LVET        |                                     | 0.94 | 0.010                 | 0.89 | 6.0*10 <sup>-3</sup>  | 28.77 | 1.02 |
| 7-feature model<br>w/ IBN  | HR, SDRR, SD1/SD2,<br>LF/HF, PEP, LVET, and<br>PEP/LVET | $\frac{x_j - \mu_{b,p}}{\mu_{b,p}}$ | 0.83 | 8.9*10 <sup>-3</sup>  | 0.89 | 3.5*10 <sup>-3</sup>  | 22.73 | 0.47 |
| 7-feature model<br>w/o IBN | HR, SDRR, SD1/SD2,<br>LF/HF, PEP, LVET, and<br>PEP/LVET |                                     | 0.91 | 0.014                 | 0.89 | 5.0*10 <sup>-3</sup>  | 30.22 | 0.63 |

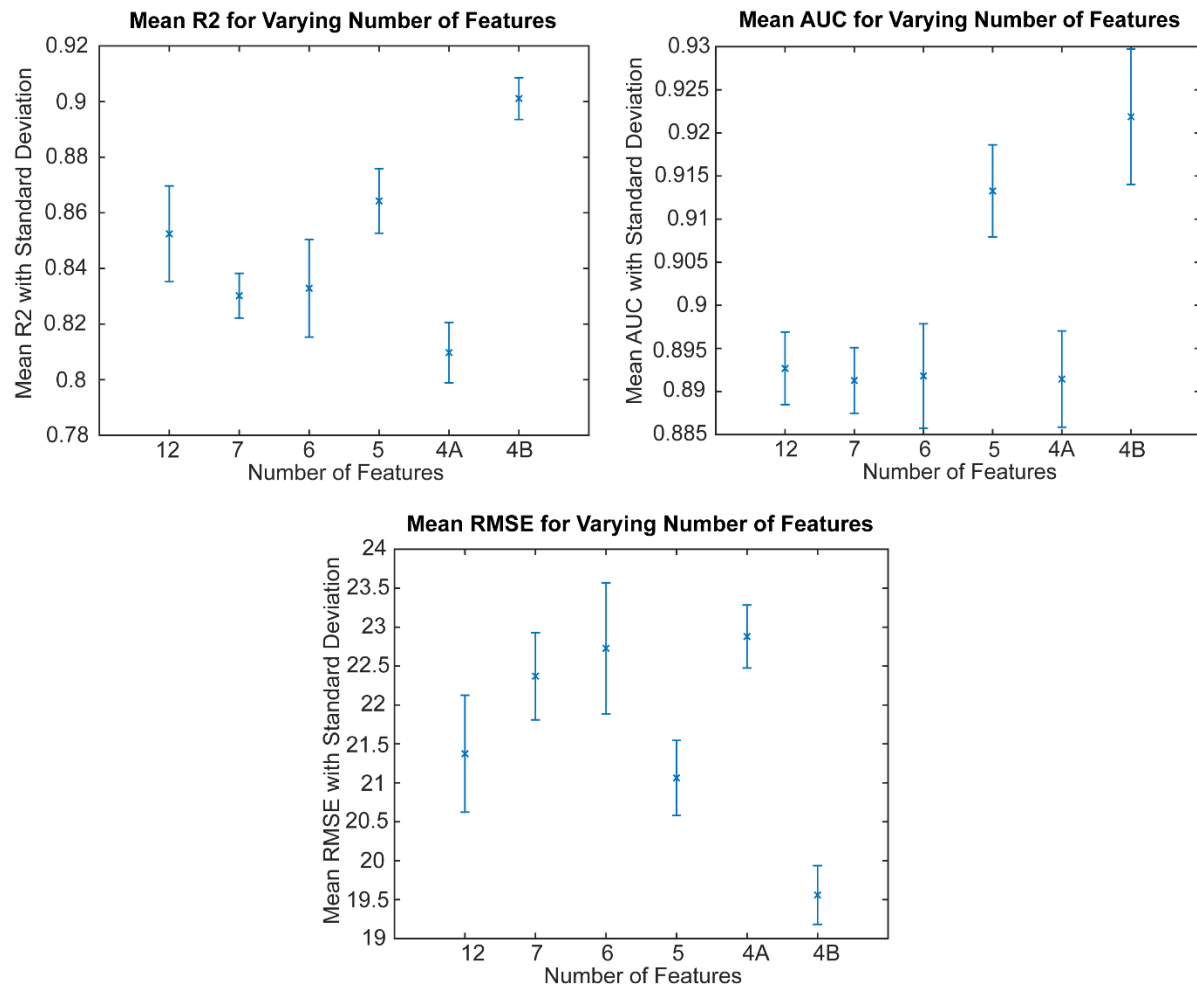

**Figure S1.** Graphical illustration of preliminary performance of ABVS models, including mean (M) and standard deviation (SD). “4A” represents a four-feature model containing the following features: HR, SDRR, LVET, and PEP/LVET. “4B” represents a four-feature model containing the following features: HR, PEP, LVET, and PEP/LVET.
